# Supplementary material for: Solution Process-Based Thickness Engineering of InZnO Semiconductors for Oxide Thin-Film Transistors with High Performance and Stability
Source: MDPI journal article supplement (doi:10.3390/mi15020193), 2024-01-27
Supplement: s1 [file s1]

## **Supplementary Material**

# **Solution Process-Based Thickness Engineering of InZnO Semiconductors for Oxide Thin-Film Transistors with High Performance and Stability**

**Xuan Zhang and Sung-Woon Cho \***

Department of Advanced Components and Materials Engineering,  
Sunchon National University, Suncheon 57922, Republic of Korea

\* Correspondence: [swcho@scnu.ac.kr](mailto:swcho@scnu.ac.kr)

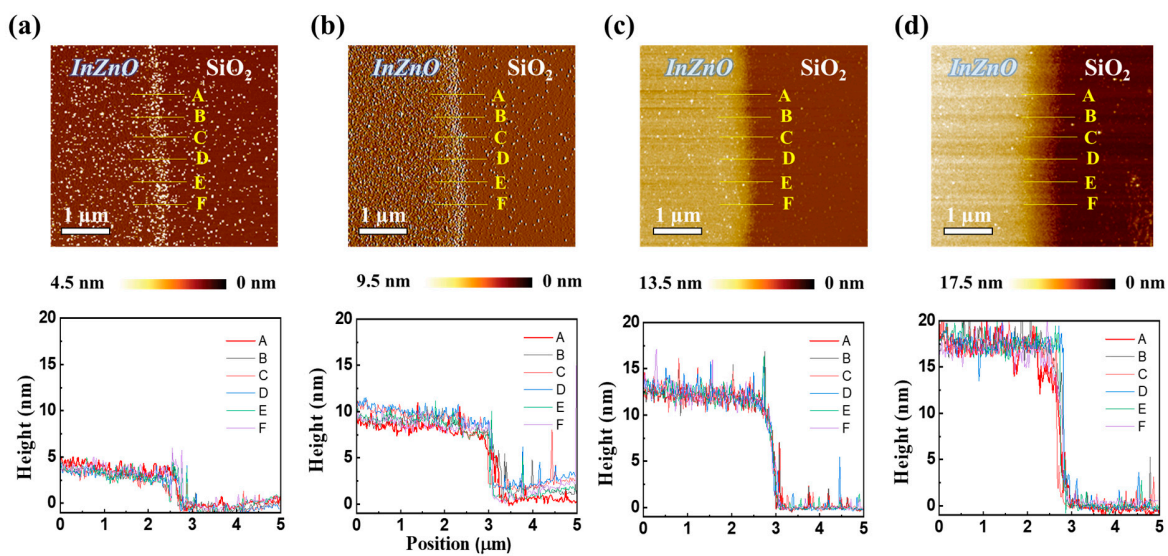

**Figure S1.** Surface image and film thickness of thickness-controlled InZnO semiconductors acquired via AFM analysis; film thicknesses are (a) 4, (b) 8, (c) 12, and (d) 16 nm.

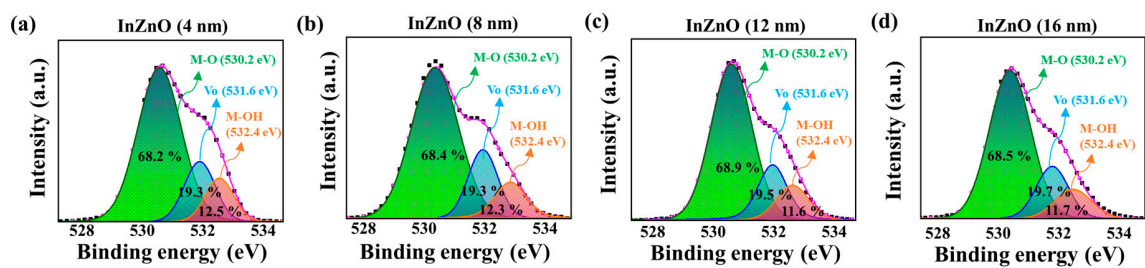

**Figure S2.** XPS O 1s peak data and deconvoluted fitting plots of InZnO semiconductors with film thicknesses of (a) 4, (b) 8, (c) 12, and (d) 16 nm.

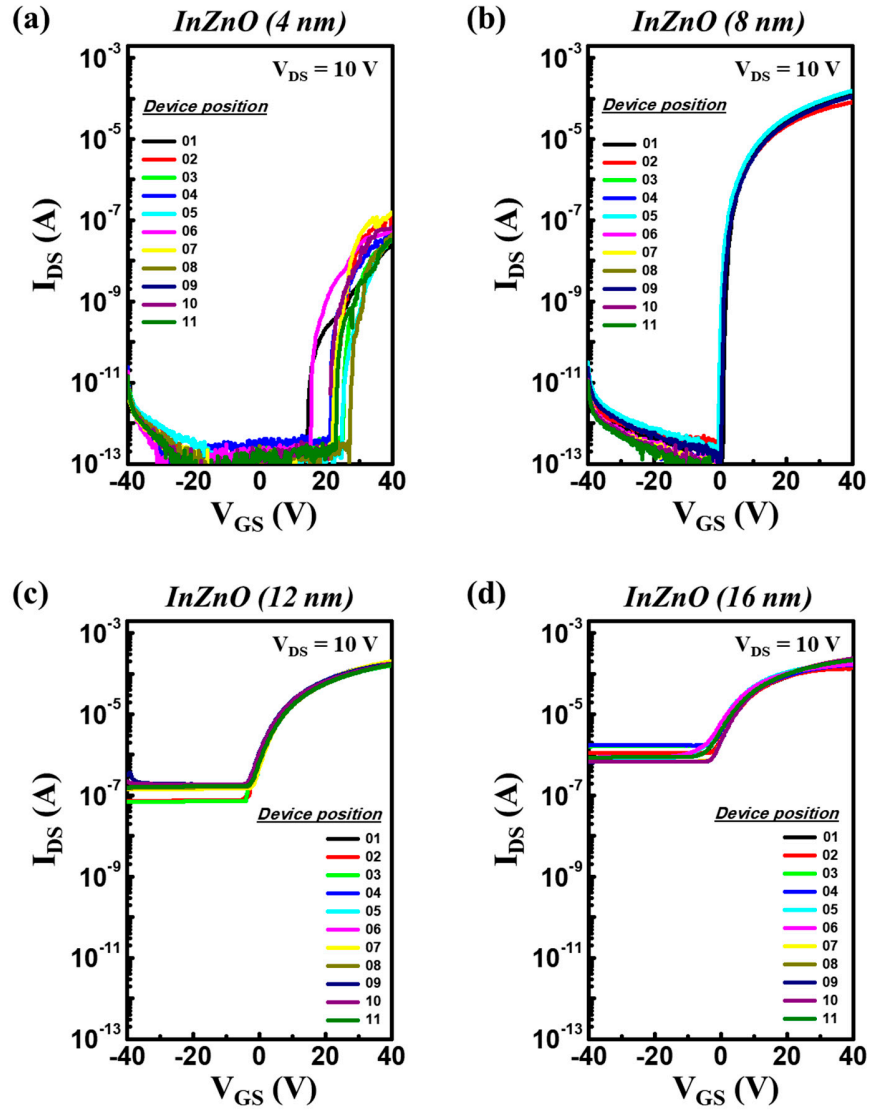

**Figure S3.** Electrical characteristics of TFTs fabricated using thickness-controlled InZnO semiconductors: (a) 4-nm-thick InZnO, (b) 8-nm-thick InZnO, (c) 12-nm-thick InZnO, and (d) 16-nm-thick InZnO. 11 devices were fabricated and measured for each channel thickness condition.

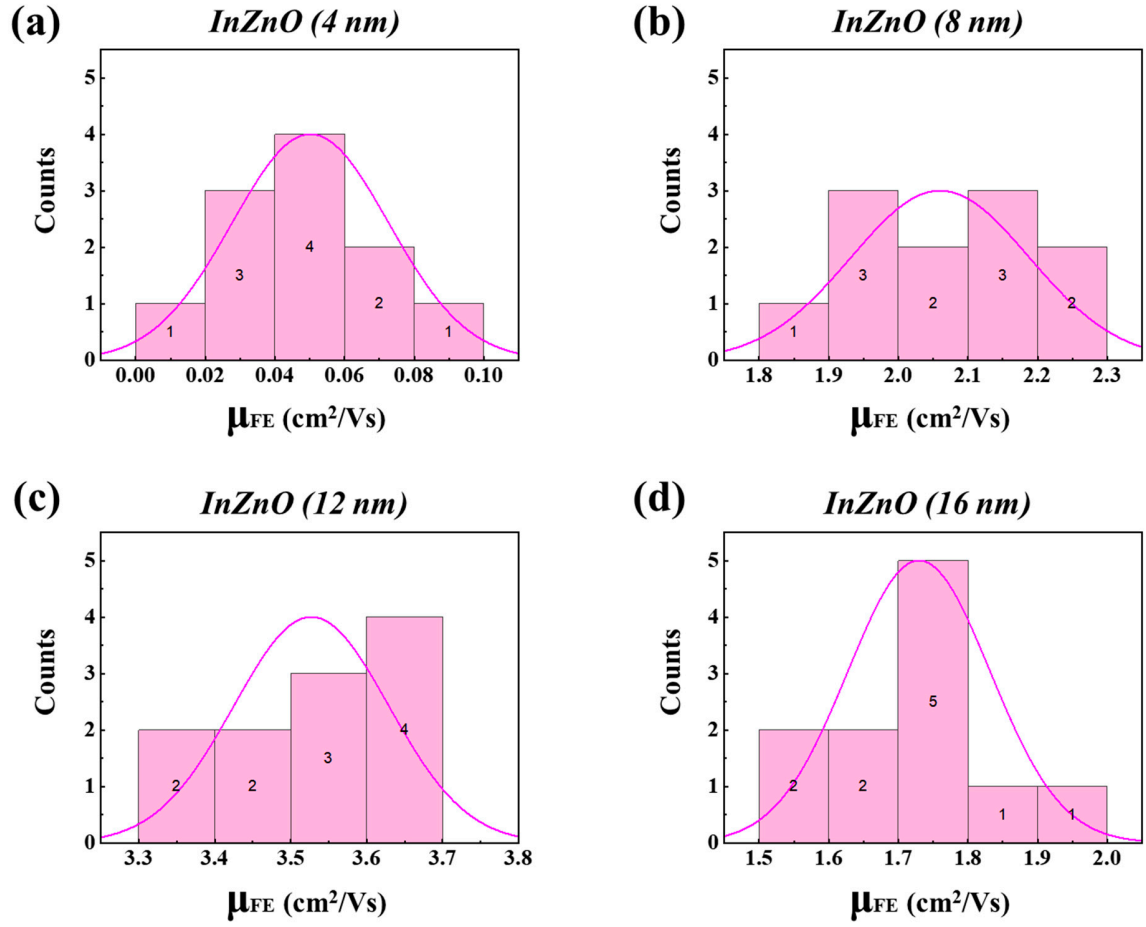

**Figure S4.** Field-effect mobility ( $\mu_{FE}$ ) of TFTs fabricated using thickness-controlled InZnO semiconductors: (a) 4-nm-thick InZnO, (b) 8-nm-thick InZnO, (c) 12-nm-thick InZnO, and (d) 16-nm-thick InZnO. 11 devices were fabricated and measured for each channel thickness condition.

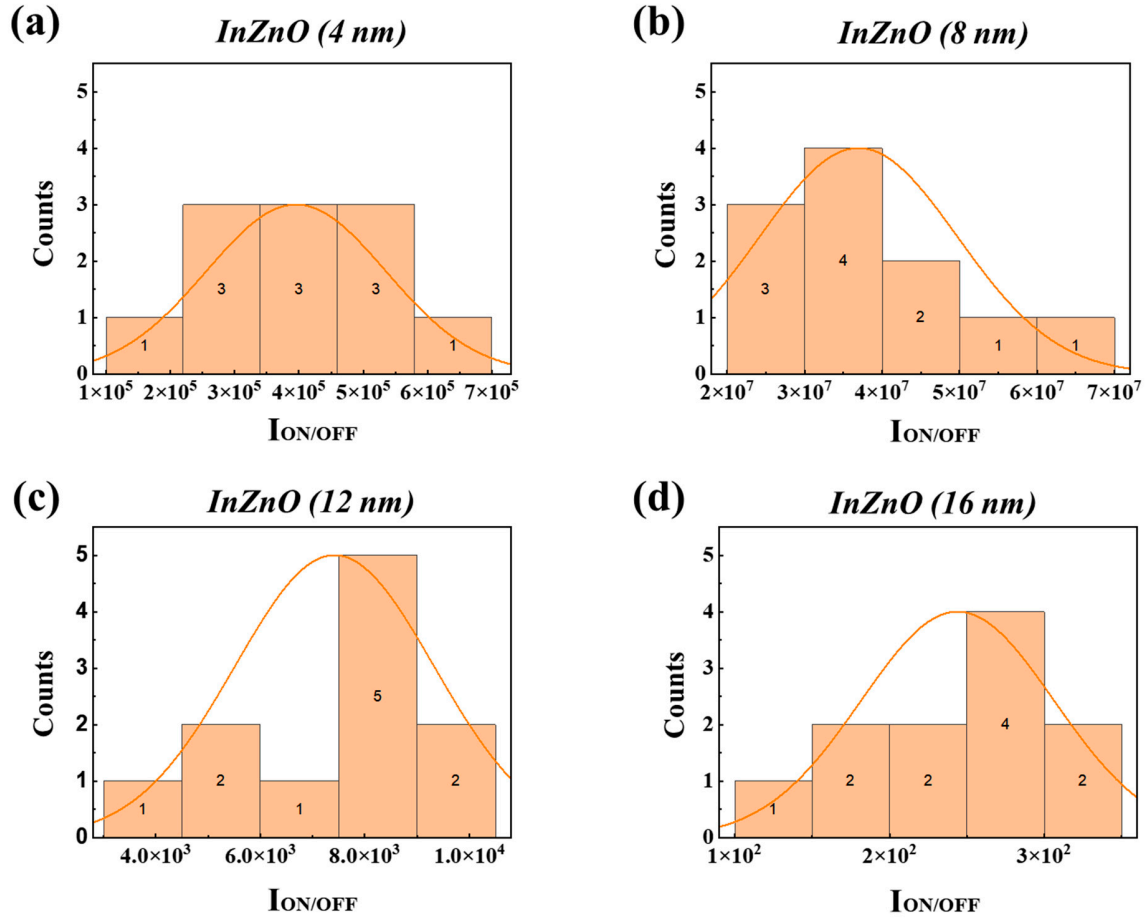

**Figure S5.** The on/off current ratio ( $I_{ON/OFF}$ ) of TFTs fabricated using thickness-controlled InZnO semiconductors: (a) 4-nm-thick InZnO, (b) 8-nm-thick InZnO, (c) 12-nm-thick InZnO, and (d) 16-nm-thick InZnO. 11 devices were fabricated and measured for each channel thickness condition.

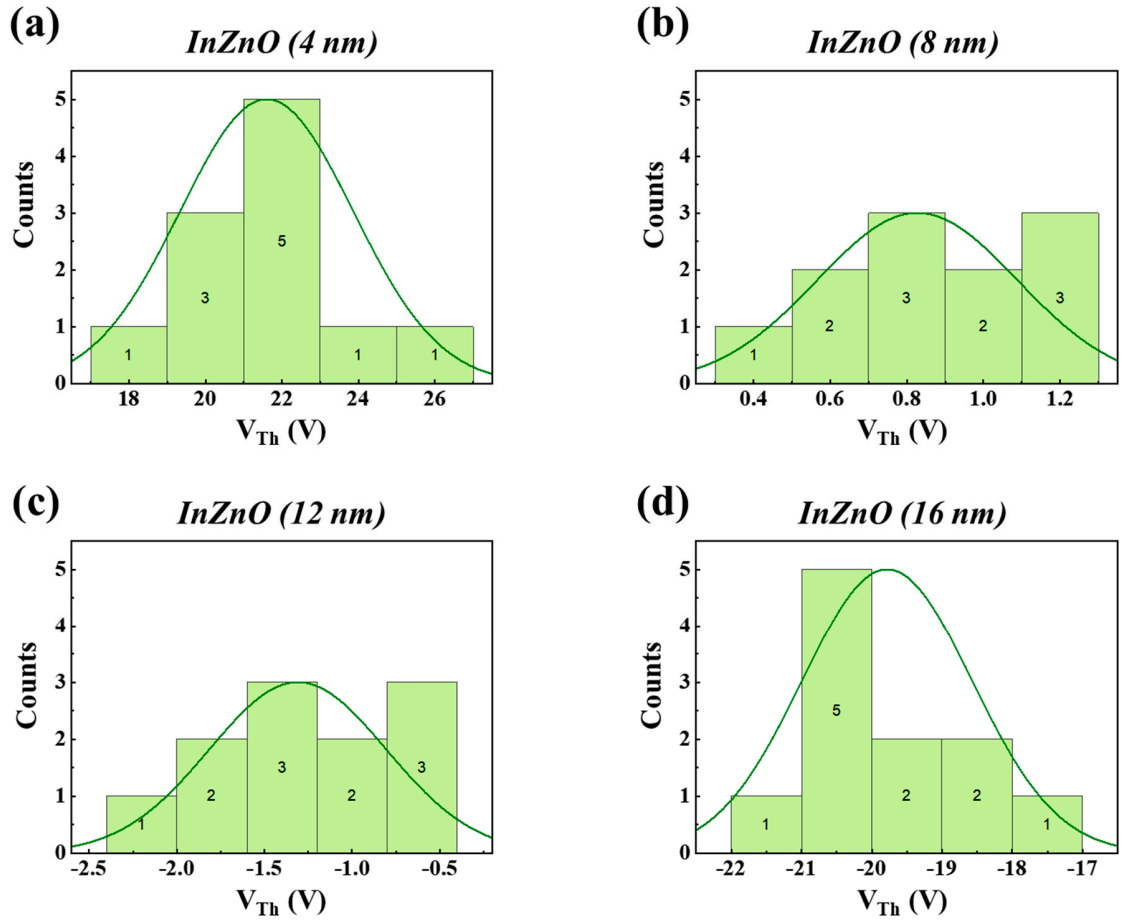

**Figure S6.** Threshold voltage ( $V_{Th}$ ) of TFTs fabricated using thickness-controlled InZnO semiconductors: (a) 4-nm-thick InZnO, (b) 8-nm-thick InZnO, (c) 12-nm-thick InZnO, and (d) 16-nm-thick InZnO. 11 devices were fabricated and measured for each channel thickness condition.

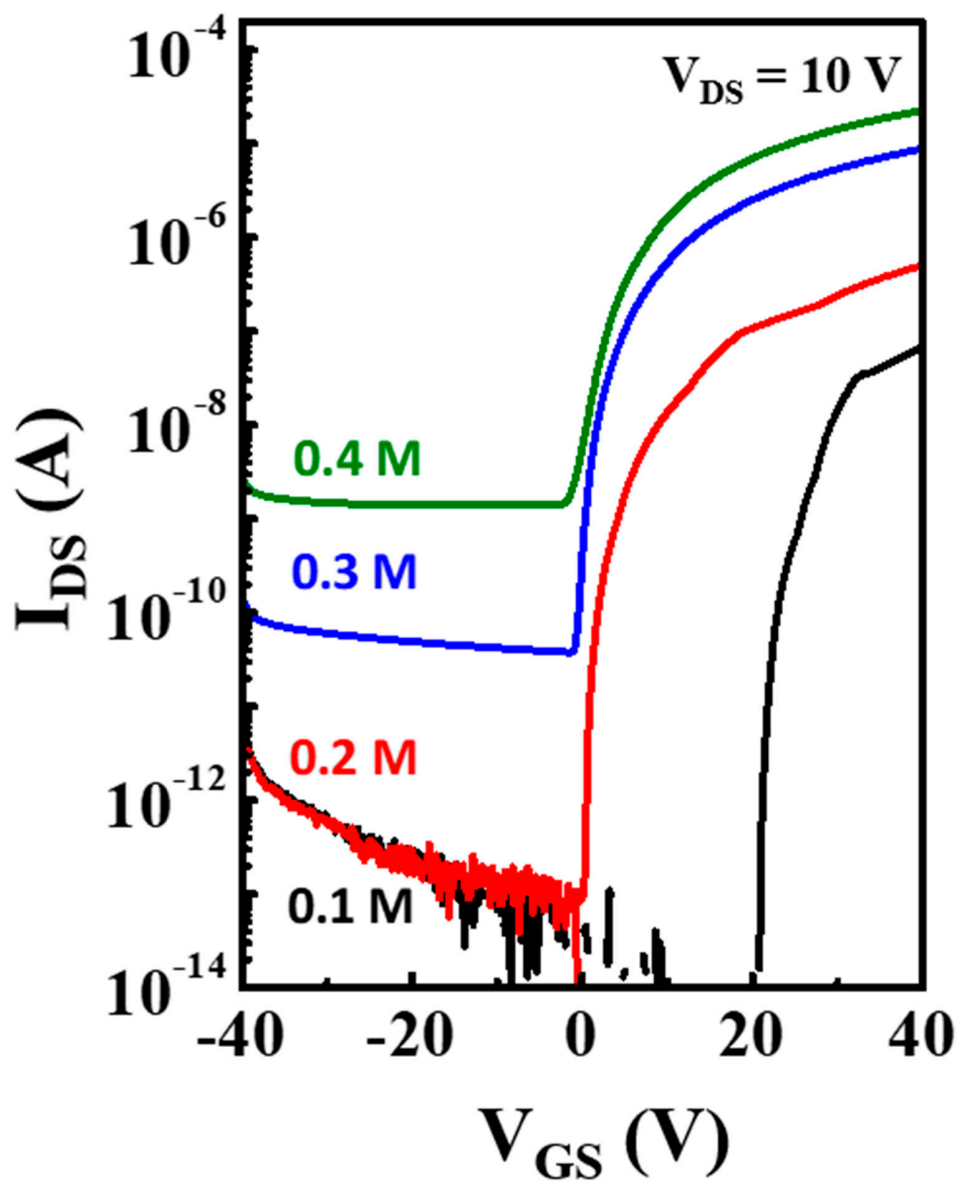

**Figure S7.** Electrical characteristics of TFTs fabricated using a single spin-coating of different concentrations of IZO solution (0.1 M to 0.4 M) obtain transistors with different InZnO thickness.



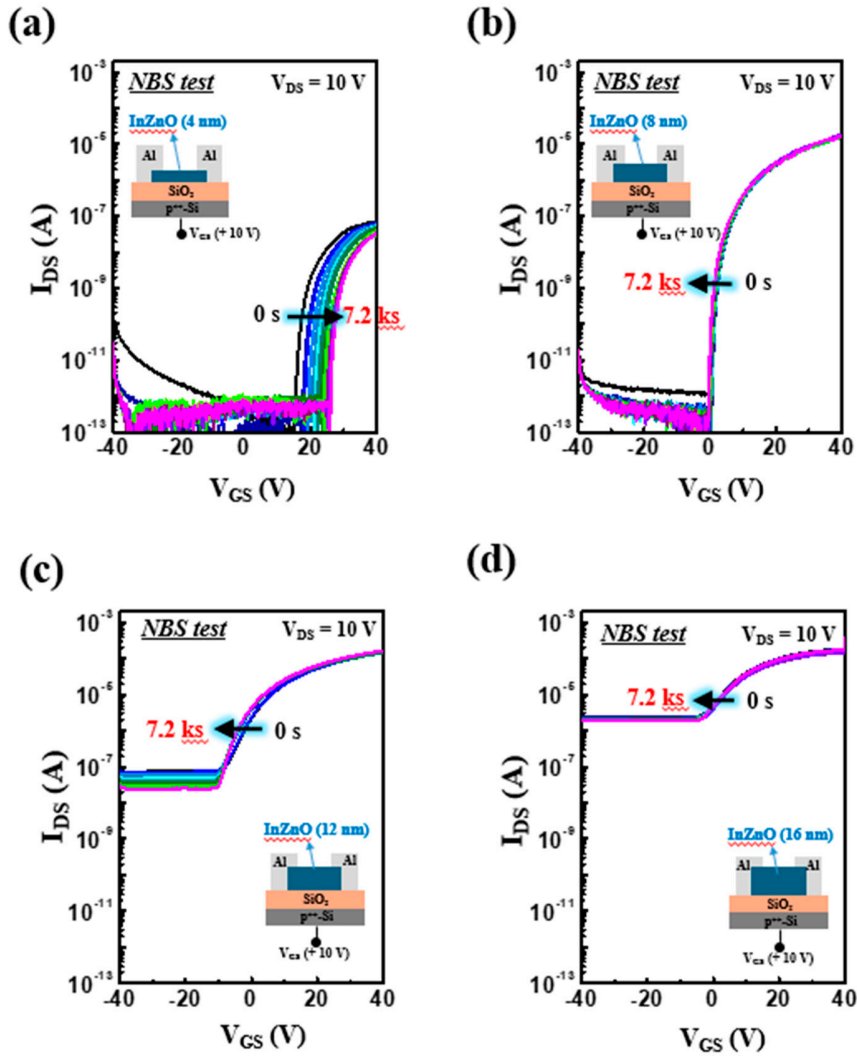

**Figure S8.** Transfer curve shifts of TFTs fabricated using thickness-controlled InZnO semiconductors under NBS tests: (a) 4-nm-thick InZnO, (b) 8-nm-thick InZnO, (c) 12-nm-thick InZnO, (d) 16-nm-thick InZnO.
